# Supplementary material
Source: PubMed Central journal article supplement (PMC4425390)
Supplement: supp_the2014-0440_Satoh-14-440.pdf [file supp_the2014-0440_Satoh-14-440.pdf]

## Overview

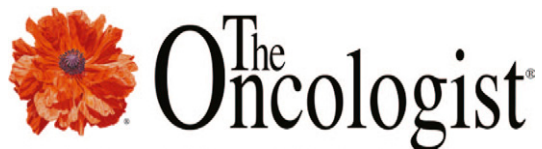

The official journal of the Society for Translational Oncology

**First Published Online April 17, 2015**

**DOI:** 10.1634/theoncologist.2014-0440

**Title:** A Phase Ib Study of Safety and Pharmacokinetics of Ramucirumab in Combination With Paclitaxel in Patients With Advanced Gastric Adenocarcinomas

**Authors:** Shinya Ueda,<sup>a</sup> Taroh Satoh,<sup>b</sup> Masahiro Gotoh,<sup>c</sup> Ling Gao,<sup>d</sup> Toshihiko Doi<sup>e</sup>

<sup>a</sup>Kinki University School of Medicine, Osaka, Japan; <sup>b</sup>Osaka University Graduate School of Medicine, Osaka, Japan; <sup>c</sup>Osaka Medical College Hospital, Osaka, Japan; <sup>d</sup>Eli Lilly and Company, Bridgewater, New Jersey, USA; <sup>e</sup>National Cancer Center Hospital East, Kashiwa, Japan

**ClinicalTrials.gov Identifier:** NCT01253525

**Sponsor(s):** Eli Lilly and Company

**Principal Investigator:** Toshihiko Doi

**IRB Approved:** Yes

### Disclosures

**Taroh Satoh:** Eli Lilly and Company, Chugai Pharmaceutical, Merck-Serono (C/A), Eli Lilly and Company, Chugai Pharmaceutical, Merck-Serono, Bristol-Myers Squibb, Yakult Honsha (RF), Chugai Pharmaceutical, Merck-Serono, Bristol-Myers Squibb, Yakult Honsha (H); **Ling Gao:** Eli Lilly and Company (E). The other authors indicated no financial relationships.

(C/A) Consulting/advisory relationship; (RF) Research funding; (E) Employment; (ET) Expert testimony; (H) Honoraria received; (OI) Ownership interests; (IP) Intellectual property rights/inventor/patent holder; (SAB) Scientific advisory board

## Author Summary: Abstract and Brief Discussion

### Background

This phase Ib study evaluated the tolerability and pharmacokinetics of ramucirumab, an anti-VEGFR-2 antibody, combined with paclitaxel as second-line therapy in Japanese patients with metastatic gastric or gastroesophageal junction adenocarcinoma after first-line therapy with fluoropyrimidines and/or platinum.

### Methods

Patients received ramucirumab 8 mg/kg on days 1 and 15 and paclitaxel 80 mg/m<sup>2</sup> on days 1, 8, and 15 of a 28-day cycle. Safety analyses included all patients ( $n = 6$ ).

### Results

No dose-limiting toxicities occurred in the first cycle. All patients experienced  $\geq 1$  treatment-emergent adverse event (TEAE); 5 patients experienced grade  $\geq 3$  TEAEs. There were two deaths caused by disease progression. The best overall responses were stable disease ( $n = 5$ ) and partial response ( $n = 1$ ). Patients received ramucirumab and paclitaxel for a median of 12.5 weeks (range: 11.4–42.7 weeks) and 12.2 weeks (range: 11.0–41.0 weeks), respectively. Following a single dose of ramucirumab IV infusion 8 mg/kg, clearance was  $\sim 0.017$  L/hour, half-life ( $t_{1/2}$ ) was 138 to 225 hours, and steady-state volume of distribution ( $V_{ss}$ ) was  $\sim 3$  L.

### Conclusion

The ramucirumab/paclitaxel combination appears to be well-tolerated in Japanese patients with advanced gastric adenocarcinomas. These results are in line with previous ramucirumab pharmacokinetic studies as anticipated.

## Discussion

The primary objective of this study was to confirm the recommended dose of ramucirumab in combination with paclitaxel and assess pharmacokinetics (PK) of ramucirumab in Japanese patients with advanced gastric adenocarcinomas who failed standard therapy with fluoropyrimidines and/or platinum. Exploratory objectives included pharmacodynamics and antitumor activity. Ramucirumab is a recombinant human monoclonal antibody against human vascular endothelial growth factor receptor-2 (VEGFR-2) preventing ligand binding and receptor-mediated pathway activation in endothelial cells [1, 2]. Inhibition of VEGFR-2 in gastric cancer xenografts (thymidylate kinase-1 cell line) is associated with reduced tumor growth [1]. Weekly administration of paclitaxel (at a dose of 80 mg/m<sup>2</sup>) has been extensively studied as second-line chemotherapy for gastric cancer and is considered standard care [3–10].

Ramucirumab plus paclitaxel is approved by the U.S. Food and Drug Administration (FDA) for second-line treatment in gastric cancer based on the 2.2-month overall survival advantage seen in the RAINBOW trial (trial was powered to detect a 2.3-month difference) [11]. In the current study, 8 mg/kg ramucirumab was administered on days 1 and 15 combined with 80 mg/m<sup>2</sup> paclitaxel on days 1, 8, and 15 in a 28-day cycle. Patients received ramucirumab and paclitaxel for a median of 12.5 weeks (range: 11.4–42.7 weeks) and 12.2 weeks (range: 11.0–41.0 weeks), respectively.

Safety analyses included all treated patients ( $n = 6$ ) (Table 1). All patients ( $n = 6$ ) experienced  $\geq 1$  treatment-emergent adverse event (TEAE) of any grade (grade  $\geq 3$  in 5 patients), ramucirumab-related TEAEs, and paclitaxel-related TEAEs. There were no ramucirumab- or paclitaxel-related grade  $\geq 4$  TEAEs. Five patients discontinued because of progressive disease (PD), and one patient discontinued because of a TEAE (meningism) not related to ramucirumab or paclitaxel. The two deaths reported were due to PD and were not study drug-related. Seven serious adverse events (SAEs) occurred in four patients. Ramucirumab- or paclitaxel-related SAEs included pneumonia in two patients and gastrointestinal hemorrhage in one patient.

Following a single IV infusion of 8 mg/kg ramucirumab, PK analysis indicated a half-life ranging from 138 to 225 hours. Following multiple doses of 8 mg/kg ramucirumab, steady state was approximately achieved on cycle 2, day 1, and the accumulation ratio calculated using area under the concentration-time curve ( $R_A$ , AUC) was approximately 1.5. Geometric mean of steady state  $C_{min}$  ranged from 44.2  $\mu\text{g/mL}$  (% coefficient of variation [CV]: 21%) to 66.6  $\mu\text{g/mL}$  (% CV: 25%) between cycle 2, day 1 and cycle 3, day 1. Trend plots for pharmacodynamic data revealed increasing levels of VEGF-D following the first ramucirumab infusion. No apparent trends were identified for VEGF-C, soluble neuropilin-1, or VEGFR-1.

No dose-limiting toxicities (DLTs) were observed within the first 28-day cycle, which was the DLT-observation period. Four patients experienced SAEs in later cycles, and predefined dose-modification strategies were used. Limitations of this study included the small sample size and uncontrolled design. Because of the small sample size, no efficacy conclusions could be drawn. In conclusion, the combination of ramucirumab and paclitaxel at the doses and schedule given did not result in any DLTs and appeared to be safe and well-tolerated in Japanese patients with advanced gastric adenocarcinomas.

## Trial Information

|                                                        |                                                                                                                                                                                                          |
|--------------------------------------------------------|----------------------------------------------------------------------------------------------------------------------------------------------------------------------------------------------------------|
| <b>Disease</b>                                         | Gastric cancer                                                                                                                                                                                           |
| <b>Stage of disease / treatment</b>                    | Metastatic / Advanced                                                                                                                                                                                    |
| <b>Prior Therapy</b>                                   | 1 prior regimen                                                                                                                                                                                          |
| <b>Type of study - 1</b>                               | Phase Ib                                                                                                                                                                                                 |
| <b>Type of study - 2</b>                               | Rolling Six                                                                                                                                                                                              |
| <b>Primary Endpoint</b>                                | Safety                                                                                                                                                                                                   |
| <b>Primary Endpoint</b>                                | Tolerability                                                                                                                                                                                             |
| <b>Secondary Endpoint</b>                              | Pharmacokinetic                                                                                                                                                                                          |
| <b>Secondary Endpoint</b>                              | Correlative Endpoint                                                                                                                                                                                     |
| <b>Additional Details of Endpoints or Study Design</b> | Preliminary assessment of the antitumor activity of ramucirumab/paclitaxel combination and assessment of effect of ramucirumab on pharmacodynamic biomarkers (VEGFR-1, VEGF-C, VEGF-D, and neuropilin-1) |
| <b>Investigator's Analysis</b>                         | Safe and should be pursued further                                                                                                                                                                       |

## Drug Information

|                            |                                                                                      |
|----------------------------|--------------------------------------------------------------------------------------|
| <b>Drug 1</b>              |                                                                                      |
| Generic/Working name       | Ramucirumab                                                                          |
| Trade name                 | Cyramza                                                                              |
| Company name               | Eli Lilly and Company                                                                |
| Drug type                  | Antibody                                                                             |
| Drug class                 | VEGFR-2 antagonist                                                                   |
| Dose                       | 8 mg/kg                                                                              |
| Route                      | IV                                                                                   |
| Schedule of Administration | Days 1 and 15 of a 28-day cycle                                                      |
| <b>Drug 2</b>              |                                                                                      |
| Generic/Working name       | Paclitaxel                                                                           |
| Trade name                 | Taxol                                                                                |
| Company name               | Bristol-Myers Squibb                                                                 |
| Drug type                  | Small molecule                                                                       |
| Drug class                 | Microtubule-targeting agent                                                          |
| Dose                       | 80 mg/m <sup>2</sup>                                                                 |
| Route                      | IV                                                                                   |
| Schedule of Administration | Days 1, 8, and 15 of each cycle, 1 hour after completion of the ramucirumab infusion |

## Patient Characteristics

| Number of patients, male            | 5                                                                                                                                                                                                                                                                          |         |       |    |          |    |          |    |   |         |          |
|-------------------------------------|----------------------------------------------------------------------------------------------------------------------------------------------------------------------------------------------------------------------------------------------------------------------------|---------|-------|----|----------|----|----------|----|---|---------|----------|
| Number of patients, female          | 1                                                                                                                                                                                                                                                                          |         |       |    |          |    |          |    |   |         |          |
| Stage                               | <table border="1"> <thead> <tr> <th>M stage</th> <th>n (%)</th> </tr> </thead> <tbody> <tr> <td>M0</td> <td>1 (16.7)</td> </tr> <tr> <td>M1</td> <td>4 (66.7)</td> </tr> <tr> <td>MX</td> <td>0</td> </tr> <tr> <td>Unknown</td> <td>1 (16.7)</td> </tr> </tbody> </table> | M stage | n (%) | M0 | 1 (16.7) | M1 | 4 (66.7) | MX | 0 | Unknown | 1 (16.7) |
| M stage                             | n (%)                                                                                                                                                                                                                                                                      |         |       |    |          |    |          |    |   |         |          |
| M0                                  | 1 (16.7)                                                                                                                                                                                                                                                                   |         |       |    |          |    |          |    |   |         |          |
| M1                                  | 4 (66.7)                                                                                                                                                                                                                                                                   |         |       |    |          |    |          |    |   |         |          |
| MX                                  | 0                                                                                                                                                                                                                                                                          |         |       |    |          |    |          |    |   |         |          |
| Unknown                             | 1 (16.7)                                                                                                                                                                                                                                                                   |         |       |    |          |    |          |    |   |         |          |
| Age                                 | Median (range): 56.9 years (range: 38.6–76.0 years)                                                                                                                                                                                                                        |         |       |    |          |    |          |    |   |         |          |
| Number of prior systemic therapies  | Median (range): Not Collected                                                                                                                                                                                                                                              |         |       |    |          |    |          |    |   |         |          |
| Performance Status:                 | ECOG<br>• 0 – 4<br>• 1 – 2<br>• 2 – 0<br>• 3 – 0<br>• unknown – 0                                                                                                                                                                                                          |         |       |    |          |    |          |    |   |         |          |
| Other                               | Not Collected                                                                                                                                                                                                                                                              |         |       |    |          |    |          |    |   |         |          |
| Cancer Types or Histologic Subtypes | Diffuse Type 1<br>Intestinal type 1<br>Unknown 4                                                                                                                                                                                                                           |         |       |    |          |    |          |    |   |         |          |

## Adverse Events

### Adverse events at all dose levels, cycle 1

| Preferred term | NC/NA <sup>a</sup> | 1   | 2  | 3  | 4  | 5  | All grades |
|----------------|--------------------|-----|----|----|----|----|------------|
| Epistaxis      | 67%                | 33% | 0% | 0% | 0% | 0% | 33%        |
| Rash           | 67%                | 33% | 0% | 0% | 0% | 0% | 33%        |

|                            |     |     |     |     |    |    |     |
|----------------------------|-----|-----|-----|-----|----|----|-----|
| Alopecia                   | 50% | 50% | 0%  | 0%  | 0% | 0% | 50% |
| Neutropenia                | 33% | 0%  | 50% | 17% | 0% | 0% | 67% |
| White blood cell decreased | 67% | 0%  | 17% | 17% | 0% | 0% | 33% |
| Diarrhea                   | 67% | 33% | 0%  | 0%  | 0% | 0% | 33% |

Adverse Events Legend

<sup>a</sup>No change from baseline/no adverse event.

Treatment-emergent adverse events reported in  $\geq 2$  patients in the dose-limiting toxicity population are reported.

Abbreviations: NA, not applicable; NC, not calculated.

## Adverse events at all dose levels, all cycles

| Preferred term                       | NC/NA <sup>a</sup> | 1   | 2   | 3   | 4  | 5  | All grades |
|--------------------------------------|--------------------|-----|-----|-----|----|----|------------|
| Epistaxis                            | 17%                | 83% | 0%  | 0%  | 0% | 0% | 83%        |
| Hemorrhoidal hemorrhage              | 67%                | 33% | 0%  | 0%  | 0% | 0% | 33%        |
| Hypertension                         | 67%                | 0%  | 33% | 0%  | 0% | 0% | 33%        |
| Proteinuria                          | 50%                | 33% | 0%  | 17% | 0% | 0% | 50%        |
| Neutropenia <sup>b</sup>             | 17%                | 0%  | 50% | 33% | 0% | 0% | 83%        |
| Rash <sup>b</sup>                    | 33%                | 67% | 0%  | 0%  | 0% | 0% | 67%        |
| Leukopenia <sup>b</sup>              | 50%                | 0%  | 33% | 17% | 0% | 0% | 50%        |
| Neuropathy <sup>b</sup>              | 50%                | 50% | 0%  | 0%  | 0% | 0% | 50%        |
| Anemia                               | 67%                | 0%  | 33% | 0%  | 0% | 0% | 33%        |
| Thrombocytopenia <sup>b</sup>        | 67%                | 33% | 0%  | 0%  | 0% | 0% | 33%        |
| Diarrhea                             | 67%                | 33% | 0%  | 0%  | 0% | 0% | 33%        |
| Nausea                               | 50%                | 50% | 0%  | 0%  | 0% | 0% | 50%        |
| Vomiting                             | 67%                | 33% | 0%  | 0%  | 0% | 0% | 33%        |
| Fatigue                              | 67%                | 33% | 0%  | 0%  | 0% | 0% | 33%        |
| Pyrexia                              | 50%                | 50% | 0%  | 0%  | 0% | 0% | 50%        |
| Pneumonia                            | 67%                | 0%  | 0%  | 33% | 0% | 0% | 33%        |
| Alanine aminotransferase increased   | 67%                | 33% | 0%  | 0%  | 0% | 0% | 33%        |
| Aspartate aminotransferase increased | 67%                | 17% | 17% | 0%  | 0% | 0% | 33%        |
| Anorexia (decreased appetite)        | 50%                | 17% | 17% | 17% | 0% | 0% | 50%        |
| Hyperglycemia                        | 67%                | 33% | 0%  | 0%  | 0% | 0% | 33%        |
| Hyponatremia                         | 67%                | 0%  | 0%  | 33% | 0% | 0% | 33%        |
| Back pain                            | 67%                | 17% | 17% | 0%  | 0% | 0% | 33%        |
| Headache                             | 67%                | 33% | 0%  | 0%  | 0% | 0% | 33%        |
| Alopecia                             | 50%                | 50% | 0%  | 0%  | 0% | 0% | 50%        |

Adverse Events Legend

<sup>a</sup>No change from baseline/no adverse event.

<sup>b</sup>Consolidated AE terms are comprised of synonymous MedDRA preferred terms: neutropenia includes neutrophil count decreased; neuropathy includes peripheral sensory neuropathy, neuropathy peripheral; leukopenia includes white blood cell decreased; rash includes rash maculo-papular; thrombocytopenia includes platelet count decreased.

Treatment-emergent adverse events reported in  $\geq 2$  patients in the safety population are reported.

Abbreviations: NA, not applicable; NC, not calculated.

## Serious adverse events

| Serious adverse event         | Grade | Related   |
|-------------------------------|-------|-----------|
| Pneumonia                     | 3     | Possible  |
| Pneumonia                     | 3     | Possible  |
| Anorexia (decreased appetite) | 3     | Unrelated |
| Gastrointestinal hemorrhage   | 2     | Possible  |
| Intestinal obstruction        | 3     | Unrelated |
| Lymphangiosis carcinomatosa   | 3     | Unrelated |
| Meningism                     | 5     | Unrelated |

## Pharmacokinetics/Pharmacodynamics

### Noncompartmental pharmacokinetic parameters for ramucirumab following single and multiple 8 mg/kg intravenous infusions

| Number of doses | Number of patients | Geometric mean (% CV)          |                            |                                                                 |                                                      |                               |                                |                   |                            |
|-----------------|--------------------|--------------------------------|----------------------------|-----------------------------------------------------------------|------------------------------------------------------|-------------------------------|--------------------------------|-------------------|----------------------------|
|                 |                    | $C_{max}$ ( $\mu\text{g/mL}$ ) | $t_{max}$ (h) <sup>a</sup> | $AUC_{(0-\tau)}$ ( $\mu\text{g}\cdot\text{h/mL}$ ) <sup>b</sup> | $AUC_{(0-\infty)}$ ( $\mu\text{g}\cdot\text{h/mL}$ ) | $t_{1/2}$ (h)                 | CL or $CL_{ss}$ (L/h)          | $V_{ss}$ (L)      | $R_A$ , $AUC^c$            |
| Single dose     | 6                  | 171 (26)                       | 4.00<br>(1.02–9.05)        | 18,300 (35)                                                     | 34,100 <sup>d</sup>                                  | 181<br>(138–225) <sup>e</sup> | 0.0166 <sup>d</sup>            | 3.27 <sup>d</sup> | NA                         |
| Multiple doses  | 4 <sup>f</sup>     | 282 (15)                       | 1.82<br>(1.03–2.15)        | 41,300,<br>42,600 <sup>d</sup>                                  | NC                                                   | 218 <sup>d</sup>              | 0.0133,<br>0.0138 <sup>d</sup> | NC                | 1.52,<br>1.53 <sup>d</sup> |

<sup>a</sup>Median (range: minimum to maximum)

<sup>b</sup> $\tau = 337$  hours on cycle 1, day 1;  $\tau = 336$  hours for other occasions.

<sup>c</sup> $R_A$ ,  $AUC = AUC_{(0-\tau)}$  cycle 2/ $AUC_{(0-\tau)}$  cycle 1.

<sup>d</sup>Individual subject value(s) are given when  $N = 1$  or 2.

<sup>e</sup>Geometric mean (range: minimum to maximum),  $N = 4$ .

<sup>f</sup>One patient had ramucirumab infusion delayed for 13 days. Another patient had ramucirumab infusion delayed for 6 days. Pharmacokinetic parameters were excluded from mean summary statistics.

Abbreviations:  $AUC_{(0-\infty)}$ , area under the concentration-time curve from zero to time infinity;  $AUC_{(0-\tau)}$ , area under the concentration-time curve over a dosing interval; CL, total body clearance;  $CL_{ss}$ , total body clearance at steady state;  $C_{max}$ , maximum observed serum concentration; CV, coefficient of variation; h, hours; NA, not applicable; NC, not calculated;  $R_A$ ,  $AUC$ , accumulation ratio based on the area under the concentration-time curve;  $t_{1/2}$ , terminal half-life;  $t_{max}$ , time to maximum observed serum concentration;  $V_{ss}$ , volume of distribution at steady-state;  $V_z$ , volume of distribution during the terminal elimination phase.

## Assessment, Analysis, and Discussion

### Completion

Study completed

### Investigator's Assessment

Safe and should be pursued further

### Discussion

This was a phase Ib study of ramucirumab with paclitaxel in Japanese patients with advanced gastric adenocarcinomas. The results demonstrate that ramucirumab (8 mg/kg) administered intravenously on days 1 and 15 in combination with paclitaxel (80 mg/m<sup>2</sup>) administered intravenously on days 1, 8, and 15 of a 28-day cycle appears to be safe and well-tolerated in Japanese patients with advanced gastric adenocarcinomas.

Ramucirumab is a recombinant human monoclonal antibody directed against human VEGFR-2 [1, 2]. Adverse events observed in phase I studies of ramucirumab given as monotherapy (8–10 mg/kg every 2 weeks or every 3 weeks) were fatigue, headache, nausea, hypertension, and peripheral edema [2]. Paclitaxel has been extensively studied as second-line chemotherapy in Western and Asian populations [3–10]. Weekly paclitaxel (80 mg/m<sup>2</sup>) is associated with a favorable safety profile in Japanese patients, with frequencies of 16% for grade 4 neutropenia and 8% for grade 3 thrombocytopenia. The frequency of grade 3 nonhematologic toxicities was less than 3% for nausea, anorexia, diarrhea, and neuromotor or neurosensory neuropathy [10]. The comparison of the safety profiles of ramucirumab and of weekly paclitaxel revealed no overlapping toxicities. The safety profile of the combination would likely consist of the side effects of both elements of the combination. Therefore, a study on six patients was deemed sufficient to confirm the feasibility of the combination in Japanese patients, which was a requirement by the Japanese Pharmaceuticals and Medical Devices Agency prior to conducting the global phase 3 trial RAINBOW in Japan [11].

The six patients in this study were treated and comprised the safety population; five (83.3%) were male, and all were Asian (Japanese), with a median age of 56.9 years (range: 38.6–76.0 years). The primary tumor location was gastric for four patients and gastroesophageal junction for two patients. All patients had metastatic disease, with metastases to one or more sites. All patients received prior chemotherapy. The median relative-dose intensity for paclitaxel across all cycles was 73.0% (range: 58.3%–97.3%) and 96.3% (range: 76.9%–105.0%) for ramucirumab.

The median duration of treatment for paclitaxel and ramucirumab was 12.2 weeks (range: 11.0–41.0 weeks) and 12.5 weeks (range: 11.4–42.7 weeks), respectively. All six treated patients were DLT-evaluable and comprised the DLT population, which was evaluated based on cycle 1 assessments. There were no DLTs in cycle 1 in this study.

The most frequently reported TEAEs by preferred term for all cycles, occurring in at least two patients, were epistaxis and neutropenia ( $n = 5$  each); rash ( $n = 4$ ); leukopenia, neuropathy, nausea, alopecia, pyrexia, decreased appetite, and proteinuria ( $n = 3$  each); and anemia, thrombocytopenia, hemorrhoidal hemorrhage, diarrhea, fatigue, vomiting, pneumonia, hyperglycemia, hyponatremia, back pain, headache, hypertension, alanine aminotransferase increased, and aspartate aminotransferase increased ( $n = 2$  each).

Adverse events of special interest (AESIs) that are commonly associated with antiangiogenic agents and therapeutic monoclonal antibodies were experienced by six patients. Grade 3 AESIs included: hematuria ( $n = 1$ ) and proteinuria ( $n = 1$ ). Both were judged as unrelated to ramucirumab or paclitaxel.

During the study, two patients had grade 3 pneumonia that was considered to be related to both ramucirumab and paclitaxel. Other grade 3 paclitaxel-related TEAEs included neutropenia, neutrophil count decreased, and white blood cell count decreased ( $n = 1$  each). There were no ramucirumab- or paclitaxel-related grade 4 or 5 TEAEs. There were no study drug-related deaths. The two reported deaths were due to disease progression and occurred 20 and 42 days after last dose. SAEs occurred in 4 patients: pneumonia ( $n = 2$ ) and gastrointestinal hemorrhage, intestinal obstruction, decreased appetite, lymphoangiosis carcinomatosa, and meningism ( $n = 1$  each). There were three SAEs (pneumonia [ $n = 2$ ] and gastrointestinal hemorrhage [ $n = 1$ ]) in two patients that were considered to be related to both ramucirumab and paclitaxel by the investigator. One patient had a TEAE of meningism not considered to be related to ramucirumab or paclitaxel, which led to treatment discontinuation. There were no TEAEs that led to treatment discontinuation in the DLT population. No efficacy conclusions were drawn from this study.

Serum samples were analyzed for ramucirumab at Intertek (Intertek Pharmaceutical Services) Analytical Laboratory (San Diego, CA, <http://www.intertek.com/pharmaceutical/>) by a validated enzyme-linked immunosorbent assay method. Pharmacokinetic data were analyzed by noncompartmental analysis using WinNonlin 5.3 (Pharsight Corporation, Tokyo, Japan, <http://www.pharsight.com>).

The PK analysis following a single intravenous infusion of 8 mg/kg ramucirumab indicated that half-life ( $t_{1/2}$ ) ranged from 138 to 225 hours. Following multiple doses every 2 weeks of 8 mg/kg ramucirumab, steady state was approximately achieved on cycle 2, day 1 (the third infusion), and accumulation based on area under the concentration-time curve ( $R_A$ , AUC) was approximately 1.5. The geometric mean of steady-state  $C_{min}$  of ramucirumab ranged from 44.2  $\mu\text{g/mL}$  (% CV: 21%) to 66.6  $\mu\text{g/mL}$  (% CV: 25%) between cycle 2, day 1 (the third infusion) and cycle 3, day 1 (the fifth infusion). The PK results here did not show significant differences when compared with PK from studies in countries other than Japan [12, 13].

Trend plots revealed that the levels of VEGF-D tend to increase following the first infusion. However, no apparent trends could be identified for VEGF-C. Trends could not be established for soluble neuropilin-1 and VEGFR-1. Immunogenicity data will be reported separately.

Antiangiogenic agents such as bevacizumab and aflibercept that target the VEGF pathway are on the market or being studied in clinical trials [14–16]. Ramucirumab is currently the only VEGFR-2 targeting monoclonal antibody approved by the FDA for metastatic gastric cancer and non-small cell lung cancer based on three pivotal phase 3 studies: REGARD, RAINBOW, and REVEL [11, 17, 18]. Future research should explore optimal timing of ramucirumab use, biomarkers for patient selection, and mechanisms of resistance. Currently, RAINFALL is the first randomized, global phase 3 study of ramucirumab with or without standard therapy aimed at improving overall survival of patients with metastatic gastric cancer in the first-line setting (clinicaltrials.gov NCT02314117). In conclusion, in this phase Ib study, the combination of ramucirumab and paclitaxel at the doses and schedule given did not result in any DLTs and appeared to be safe and well-tolerated in Japanese patients with advanced gastric adenocarcinomas.

## Acknowledgment

The authors gratefully acknowledge Dr. Hiroya Takiuchi for his contributions to this study.

## References

1. Lu D, Shen J, Vil MD et al. Tailoring in vitro selection for a picomolar affinity human antibody directed against vascular endothelial growth factor receptor 2 for enhanced neutralizing activity. *J Biol Chem* 2003;278:43496–43507.
2. Spratlin JL, Cohen RB, Eadens M et al. Phase I pharmacologic and biologic study of ramucirumab (IMC-1121B), a fully human immunoglobulin G1 monoclonal antibody targeting the vascular endothelial growth factor receptor-2. *J Clin Oncol* 2010;28:780–787.
3. Cascinu S, Graziano F, Cardarelli N et al. Phase II study of paclitaxel in pretreated advanced gastric cancer. *Anticancer Drugs* 1998;9:307–310.

4. Hironaka S, Ueda S, Yasui H et al. Randomized, open-label, phase III study comparing irinotecan with paclitaxel in patients with advanced gastric cancer without severe peritoneal metastasis after failure of prior combination chemotherapy using fluoropyrimidine plus platinum: WJOG 4007 trial. *J Clin Oncol* 2013;31:4438–4444.
5. Kodera Y, Ito S, Mochizuki Y et al. A phase II study of weekly paclitaxel as second-line chemotherapy for advanced gastric Cancer (CCOG0302 study). *Anticancer Res* 2007;27(4C):2667–2671.
6. Matsuda G, Kunisaki C, Makino H et al. Phase II study of weekly paclitaxel as a second-line treatment for S-1-refractory advanced gastric cancer. *Anticancer Res* 2009;29:2863–2867.
7. Satoh T, Xu RH, Chung HC et al. Lapatinib plus paclitaxel versus paclitaxel alone in the second-line treatment of HER2-amplified advanced gastric cancer in Asian populations: TyTAN—a randomized, phase III study. *J Clin Oncol* 2014;32:2039–2049.
8. Yamada Y, Shirao K, Ohtsu A et al. Phase II trial of paclitaxel by three-hour infusion for advanced gastric cancer with short premedication for prophylaxis against paclitaxel-associated hypersensitivity reactions. *Ann Oncol* 2001;12:1133–1137.
9. Yamamoto H, Watanabe Y, Maehata T et al. An updated review of gastric cancer in the next-generation sequencing era: Insights from bench to bedside and vice versa. *World J Gastroenterol* 2014;20:3927–3937.
10. Hironaka S, Zenda S, Boku N et al. Weekly paclitaxel as second-line chemotherapy for advanced or recurrent gastric cancer. *Gastric Cancer* 2006;9:14–18.
11. Wilke H, Muro K, Van Cutsem E et al. Ramucirumab plus paclitaxel versus placebo plus paclitaxel in patients with previously treated advanced gastric or gastro-oesophageal junction adenocarcinoma (RAINBOW): A double-blind, randomised phase 3 trial. *Lancet Oncol* 2014;15:1224–1235.
12. Eli Lilly and Company. A study of ramucirumab and docetaxel in patients with solid tumors (NCT01567163). Available at <http://www.clinicaltrials.gov>. Accessed March 27, 2015.
13. Eli Lilly and Company. A study of ramucirumab (IMC-1121B) and paclitaxel in participants with solid tumors (NCT01515306). Available at <http://www.clinicaltrials.gov>. Accessed March 27, 2015.
14. Shih T, Lindley C. Bevacizumab: An angiogenesis inhibitor for the treatment of solid malignancies. *Clin Ther* 2006;28:1779–1802.
15. Sharma T, Dhingra R, Singh S et al. Aflibercept: A novel VEGF targeted agent to explore the future perspectives of anti-angiogenic therapy for the treatment of multiple tumors. *Mini Rev Med Chem* 2013;13:530–540.
16. Gotink KJ, Verheul HM. Anti-angiogenic tyrosine kinase inhibitors: What is their mechanism of action? *Angiogenesis* 2010;13:1–14.
17. Fuchs CS, Tomasek J, Yong CJ et al. Ramucirumab monotherapy for previously treated advanced gastric or gastro-oesophageal junction adenocarcinoma (REGARD): An international, randomised, multicentre, placebo-controlled, phase 3 trial. *Lancet* 2014;383:31–39.
18. Garon EB, Ciuleanu TE, Arrieta O et al. Ramucirumab plus docetaxel versus placebo plus docetaxel for second-line treatment of stage IV non-small-cell lung cancer after disease progression on platinum-based therapy (REVEL): A multicentre, double-blind, randomised phase 3 trial. *Lancet* 2014;384:665–673.

## Figure and Tables

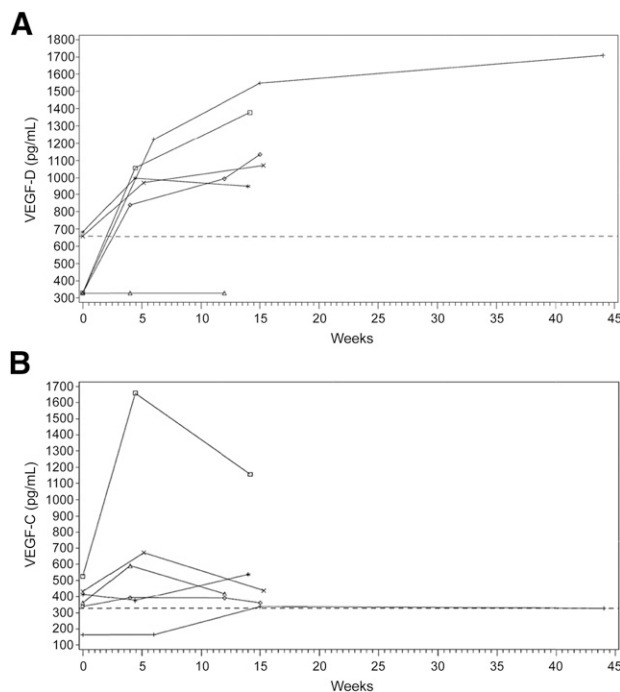

**Figure 1.** Change over time in VEGF-D (A) and VEGF-C (B) levels ( $n = 6$ ).  
Abbreviations: VEGF, vascular endothelial growth factor.

**Table 1 Author Summary.** Treatment-emergent adverse events (safety population,  $N = 6$ )

| Adverse Events                                 | $n$ (%)   |
|------------------------------------------------|-----------|
| Any DLT <sup>a</sup>                           | 0         |
| AE of any grade                                | 6 (100.0) |
| Ramucirumab-related                            | 6 (100.0) |
| Paclitaxel-related                             | 6 (100.0) |
| Any SAE                                        | 4 (66.7)  |
| Ramucirumab-related                            | 2 (33.3)  |
| Paclitaxel-related                             | 2 (33.3)  |
| AE $\geq$ grade 3                              | 5 (83.3)  |
| Ramucirumab-related                            | 2 (33.3)  |
| Paclitaxel-related                             | 4 (66.7)  |
| AE resulting in death <sup>b</sup>             | 0         |
| Ramucirumab-related                            | 0         |
| Paclitaxel-related                             | 0         |
| AE resulting in ramucirumab delay/modification | 4 (66.7)  |
| AE resulting in paclitaxel delay/modification  | 4 (66.7)  |



|                                             |          |
|---------------------------------------------|----------|
| AE resulting in ramucirumab discontinuation | 1 (16.7) |
| AE resulting in paclitaxel discontinuation  | 1 (16.7) |

<sup>a</sup>A DLT-evaluable patient (that is, a patient who is fully evaluable for determination of safety) was considered to be one who had either completed the first cycle of study medication or discontinued study medication because of a DLT during cycle 1. An AE meeting the definition of a DLT was only considered a DLT if it occurred during the first cycle (28 days).

<sup>b</sup>There were two deaths reported in this study. Both deaths were due to disease progression.

Abbreviations: AE, adverse event; DLT, dose-limiting toxicity; SAE, serious adverse event.

**Table 1.** Patient demographics, characteristics, and disease status at baseline (safety population,  $N = 6$ )

| Characteristics                            | Value        |
|--------------------------------------------|--------------|
| Age (years)                                |              |
| Mean (SD)                                  | 57.6 (15.50) |
| Median                                     | 56.9         |
| Sex, $n$ (%)                               |              |
| Male                                       | 5 (83.3)     |
| Race, $n$ (%)                              |              |
| Asian                                      | 6 (100.0)    |
| ECOG, $n$ (%)                              |              |
| 0                                          | 4 (66.7)     |
| 1                                          | 2 (33.3)     |
| $\geq 2$                                   | 0            |
| Primary tumor location, $n$ (%)            |              |
| Gastric                                    | 4 (66.7)     |
| Gastroesophageal junction                  | 2 (33.3)     |
| Duration of disease (months)               |              |
| Mean (SD)                                  | 9.9 (8.81)   |
| Median                                     | 9.0          |
| Patients with any metastatic site, $n$ (%) | 6 (100.0)    |
| Lung                                       | 1 (16.7)     |
| Liver                                      | 4 (16.7)     |
| Bone                                       | 1 (16.7)     |
| Brain                                      | 0            |
| Skin                                       | 0            |
| Lymph nodes                                | 5 (83.3)     |
| Soft tissue                                | 0            |
| Other: esophagus                           | 1 (16.7)     |
| Other: abdominal wall                      | 1 (16.7)     |
| Prior disease-related therapy, $n$ (%)     |              |
| Chemotherapy                               | 6 (100.0)    |
| Hormonal                                   | 0            |

|                                                  |           |
|--------------------------------------------------|-----------|
| Immunotherapy                                    | 0         |
| Biologic                                         | 0         |
| Other                                            | 0         |
| Prior disease-related radiotherapy, <i>n</i> (%) |           |
| Yes                                              | 0         |
| No                                               | 6 (100.0) |
| Prior disease-related surgery, <i>n</i> (%)      |           |
| Yes                                              | 3 (50.0)  |
| No                                               | 3 (50.0)  |

Abbreviation: ECOG, Eastern Cooperative Oncology Group.

**Table 2.** Best overall response (safety population, *N* = 6)

| Response                                           | <i>n</i> (%)     |
|----------------------------------------------------|------------------|
| CR                                                 | 0                |
| PR                                                 | 1 (16.7)         |
| SD                                                 | 5 (83.3)         |
| Progressive disease                                | 0                |
| Not evaluable                                      | 0                |
| Objective response rate (CR + PR), %<br>(95% CI)   | 16.7 (0.4–64.1)  |
| Disease control rate (CR + PR + SD), %<br>(95% CI) | 100 (54.1–100.0) |

Abbreviations: CI, confidence interval; CR, complete response; PR, partial response; SD, stable disease.

**Table 3.** Noncompartmental pharmacokinetic parameters for ramucirumab following single and multiple 8 mg/kg intravenous infusions

| Number of doses | Number of patients | Geometric mean (% CV)                 |                            |                                                                        |                                                             |                               |                                |                   |                            |
|-----------------|--------------------|---------------------------------------|----------------------------|------------------------------------------------------------------------|-------------------------------------------------------------|-------------------------------|--------------------------------|-------------------|----------------------------|
|                 |                    | $C_{max}$ ( $\mu\text{g}/\text{mL}$ ) | $t_{max}$ (h) <sup>a</sup> | $AUC_{(0-\tau)}$ ( $\mu\text{g}\cdot\text{h}/\text{mL}$ ) <sup>b</sup> | $AUC_{(0-\infty)}$ ( $\mu\text{g}\cdot\text{h}/\text{mL}$ ) | $t_{1/2}$ (h)                 | CL or $CL_{ss}$ (L/h)          | $V_{ss}$ (L)      | $R_A$ , $AUC^c$            |
| Single dose     | 6                  | 171 (26)                              | 4.00<br>(1.02–9.05)        | 18,300 (35)                                                            | 34,100 <sup>d</sup>                                         | 181<br>(138–225) <sup>e</sup> | 0.0166 <sup>d</sup>            | 3.27 <sup>d</sup> | NA                         |
| Multiple doses  | 4 <sup>f</sup>     | 282 (15)                              | 1.82<br>(1.03–2.15)        | 41,300,<br>42,600 <sup>d</sup>                                         | NC                                                          | 218 <sup>d</sup>              | 0.0133,<br>0.0138 <sup>d</sup> | NC                | 1.52,<br>1.53 <sup>d</sup> |

<sup>a</sup>Median (range: minimum to maximum)

<sup>b</sup> $\tau$  = 337 hours on cycle 1, day 1;  $\tau$  = 336 hours for other occasions.

<sup>c</sup> $R_A$ ,  $AUC$  =  $AUC_{(0-\tau)}$  cycle 2/ $AUC_{(0-\tau)}$  cycle 1.

<sup>d</sup>Individual subject value(s) are given when *N* = 1 or 2.

<sup>e</sup>Geometric mean (range: minimum to maximum), *N* = 4.

<sup>f</sup>One patient had ramucirumab infusion delayed for 13 days. Another patient had ramucirumab infusion delayed for 6 days. Pharmacokinetic parameters were excluded from mean summary statistics.

Abbreviations:  $AUC_{(0-\infty)}$ , area under the concentration-time curve from zero to time infinity;  $AUC_{(0-\tau)}$ , area under the concentration-time curve over a dosing interval; CL, total body clearance;  $CL_{ss}$ , total body clearance at steady state;  $C_{max}$ , maximum observed serum concentration; CV, coefficient of variation; h, hours; NA, not applicable; NC, not calculated;  $R_A$ ,  $AUC$ , accumulation ratio based on the area under the concentration-time curve;  $t_{1/2}$ , terminal half-life;  $t_{max}$ , time to maximum observed serum concentration;  $V_{ss}$ , volume of distribution at steady-state;  $V_z$ , volume of distribution during the terminal elimination phase.

**Table 4.** Patient disposition, all enrolled patients

| <b>Patient disposition</b>                    | <b>n (%)</b> |
|-----------------------------------------------|--------------|
| Enrolled                                      | 7 (100.0)    |
| Treated                                       | 6 (85.7)     |
| Safety population                             | 6 (85.7)     |
| DLT population                                | 6 (85.7)     |
| Completed cycle 1                             | 6 (100.0)    |
| Reasons for discontinuation                   |              |
| Death                                         | 0            |
| Adverse event                                 | 1 (16.7)     |
| Progressive disease—objective tumor response  | 5 (83.3)     |
| Progressive disease—symptomatic deterioration | 0            |
| Lost to follow-up                             | 0            |
| Withdrew consent                              | 0            |
| Completed therapy                             | 0            |
| Other                                         | 0            |

Abbreviation: DLT, dose-limiting toxicity.

**Table 5.** Treatment-emergent adverse events (safety population, *N* = 6)

| <b>Treatment-emergent adverse events</b>       | <b>n (%)</b> |
|------------------------------------------------|--------------|
| Any DLT <sup>a</sup>                           | 0            |
| AE of any grade                                | 6 (100.0)    |
| Ramucirumab-related                            | 6 (100.0)    |
| Paclitaxel-related                             | 6 (100.0)    |
| Any SAE                                        | 4 (66.7)     |
| Ramucirumab-related                            | 2 (33.3)     |
| Paclitaxel-related                             | 2 (33.3)     |
| AE ≥ grade 3                                   | 5 (83.3)     |
| Ramucirumab-related                            | 2 (33.3)     |
| Paclitaxel-related                             | 4 (66.7)     |
| AE resulting in death <sup>b</sup>             | 0            |
| Ramucirumab-related                            | 0            |
| Paclitaxel-related                             | 0            |
| AE resulting in ramucirumab delay/modification | 4 (66.7)     |
| AE resulting in paclitaxel delay/modification  | 4 (66.7)     |
| AE resulting in ramucirumab discontinuation    | 1 (16.7)     |
| AE resulting in paclitaxel discontinuation     | 1 (16.7)     |

<sup>a</sup>A DLT-evaluable patient (that is, fully evaluable for determination of safety) was considered to be one who had either completed the first cycle of study medication or discontinued study medication because of a DLT during cycle 1. An AE meeting the definition of a DLT was only considered a DLT if it occurred during the first cycle (28 days).

<sup>b</sup>There were two deaths reported in this study. Both deaths were due to disease progression.

Abbreviations: AE, adverse event; DLT, dose-limiting toxicity; SAE, serious adverse event.

**Table 6.** Ramucirumab-related treatment-emergent adverse events reported in  $\geq 2$  patients (safety population,  $N = 6$ )

| Preferred term              | <i>n</i> (%) |
|-----------------------------|--------------|
| Any grade                   |              |
| Patients with $\geq 1$ TEAE | 6 (100.0)    |
| Epistaxis                   | 5 (83.3)     |
| Rash                        | 4 (66.7)     |
| Proteinuria                 | 3 (50.0)     |
| Anemia                      | 2 (33.3)     |
| Decreased appetite          | 2 (33.3)     |
| Hemorrhoidal hemorrhage     | 2 (33.3)     |
| Nausea                      | 2 (33.3)     |
| Pneumonia <sup>a</sup>      | 2 (33.3)     |
| Grade $\geq 3$ <sup>b</sup> |              |
| Patients with TEAEs         | 2 (33.3)     |
| Pneumonia                   | 2 (33.3)     |

<sup>a</sup>Pneumonia was considered to be related to both ramucirumab and paclitaxel.

<sup>b</sup>No ramucirumab-related grade 4 or 5 TEAEs were observed.

Abbreviation: TEAE, treatment-emergent adverse event.

**Table 7.** Paclitaxel-related treatment-emergent adverse events reported in  $\geq 2$  patients (safety population,  $N = 6$ )

| Preferred term                   | <i>n</i> (%) |
|----------------------------------|--------------|
| Any grade                        |              |
| Patients with $\geq 1$ TEAE      | 6 (100.0)    |
| Neutropenia                      | 4 (66.7)     |
| Alopecia                         | 3 (50.0)     |
| Epistaxis                        | 3 (50.0)     |
| Rash                             | 3 (50.0)     |
| Anemia                           | 2 (33.3)     |
| Decreased appetite               | 2 (33.3)     |
| Nausea                           | 2 (33.3)     |
| Peripheral sensory neuropathy    | 2 (33.3)     |
| Platelet count decreased         | 2 (33.3)     |
| Pneumonia <sup>a</sup>           | 2 (33.3)     |
| White blood cell count decreased | 2 (33.3)     |
| Grade $\geq 3$ <sup>b</sup>      |              |
| Patients with TEAEs              | 4 (66.7)     |
| Pneumonia                        | 2 (33.3)     |
| Neutropenia                      | 1 (16.7)     |
| Neutrophil count decreased       | 1 (16.7)     |
| White blood cell count decreased | 1 (16.7)     |

<sup>a</sup>Pneumonia was considered to be related to both ramucirumab and paclitaxel.

<sup>b</sup>No paclitaxel-related grade 4 or 5 TEAEs were observed.

Abbreviation: TEAE, treatment-emergent adverse event.

**Table 8.** Serious adverse events (safety population,  $N = 6$ )

| <b>Serious adverse event</b>         | <b><i>n</i> (%)</b>   |
|--------------------------------------|-----------------------|
| Patients with serious adverse events | 4 (66.7)              |
| Pneumonia                            | 2 (33.3) <sup>a</sup> |
| Decreased appetite                   | 1 (16.7)              |
| Gastrointestinal hemorrhage          | 1 (16.7) <sup>a</sup> |
| Intestinal obstruction               | 1 (16.7)              |
| Lymphangiosis carcinomatosa          | 1 (16.7)              |
| Meningism                            | 1 (16.7)              |

<sup>a</sup>Related to ramucirumab and paclitaxel.

[Click here](#) to access other published clinical trials.

---
